# Supplementary material for: Flatband and Indirect Bandgap Cocrystals for Efficient Photothermal Conversion
Source: Research Square preprint supplement (doi:10.21203/rs.3.rs-5304768/v1), 2025-03-06

## checkCIF/PLATON report

Structure factors have been supplied for datablock(s) cu\_240116lu\_lgpz130644\_0m

THIS REPORT IS FOR GUIDANCE ONLY. IF USED AS PART OF A REVIEW PROCEDURE FOR PUBLICATION, IT SHOULD NOT REPLACE THE EXPERTISE OF AN EXPERIENCED CRYSTALLOGRAPHIC REFEREE.

No syntax errors found.      CIF dictionary      Interpreting this report

### Datablock: cu\_240116lu\_lgpz130644\_0m

---

Bond precision:      C-C = 0.0027 Å      Wavelength=1.54178

Cell:                      a=10.5994 (2)              b=9.7322 (2)              c=19.1707 (4)  
                            alpha=90              beta=93.164 (1)              gamma=90

Temperature:              193 K

|                        | Calculated                  | Reported                  |
|------------------------|-----------------------------|---------------------------|
| Volume                 | 1974.55 (7)                 | 1974.55 (7)               |
| Space group            | P 21/n                      | P 1 21/n 1                |
| Hall group             | -P 2yn                      | -P 2yn                    |
| Moiety formula         | C24 H12, 0.5 (C12 H2 F2 N4) | C12 H2 F2 N4, 2 (C24 H12) |
| Sum formula            | C30 H13 F N2                | C60 H26 F2 N4             |
| Mr                     | 420.42                      | 840.85                    |
| Dx, g cm <sup>-3</sup> | 1.414                       | 1.414                     |
| Z                      | 4                           | 2                         |
| Mu (mm <sup>-1</sup> ) | 0.719                       | 0.719                     |
| F000                   | 864.0                       | 864.0                     |
| F000'                  | 866.57                      |                           |
| h, k, lmax             | 13, 12, 24                  | 13, 12, 24                |
| Nref                   | 4325                        | 4013                      |
| Tmin, Tmax             | 0.917, 0.937                | 0.656, 0.754              |
| Tmin'                  | 0.917                       |                           |

Correction method= # Reported T Limits: Tmin=0.656 Tmax=0.754  
AbsCorr = MULTI-SCAN

Data completeness= 0.928              Theta (max)= 79.954

|                                |                   |
|--------------------------------|-------------------|
| R(reflections)= 0.0652 ( 3187) | wR2(reflections)= |
| S = 1.080                      | 0.1911 ( 4013)    |
| Npar= 525                      |                   |

---

The following ALERTS were generated. Each ALERT has the format

**test-name\_ALERT\_alert-type\_alert-level.**

Click on the hyperlinks for more details of the test.

---

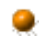

#### Alert level B

PLAT088\_ALERT\_3\_B Poor Data / Parameter Ratio ..... 7.64 Note

**Author Response: Structural disorder of the sample lead to the poor data / parameter ratio.**

---

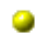

#### Alert level C

PLAT042\_ALERT\_1\_C Calc. and Reported MoietyFormula Strings Differ Please Check  
Calc: C24 H12, 0.5(C12 H2 F2 N4)  
Rep.: C12 H2 F2 N4, 2(C24 H12)

PLAT094\_ALERT\_2\_C Ratio of Maximum / Minimum Residual Density .... 2.18 Report

PLAT250\_ALERT\_2\_C Large U3/U1 Ratio for <U(i,j)> Tensor(Resd 1) 2.1 Note

PLAT906\_ALERT\_3\_C Large K Value in the Analysis of Variance ..... 3.620 Check

PLAT906\_ALERT\_3\_C Large K Value in the Analysis of Variance ..... 3.376 Check

PLAT911\_ALERT\_3\_C Missing FCF Refl Between Thmin & STh/L= 0.600 35 Report

2 0 0, 3 1 0, 6 1 0, 6 2 0, -11 2 1, -3 0 1,  
3 0 1, 3 1 1, 5 1 1, 6 1 1, 6 2 1, -10 0 2,  
5 1 2, 6 2 2, -12 0 4, -12 3 5, 8 6 5, -12 0 6,  
-12 1 6, -12 1 7, -12 2 7, -9 0 7, -2 11 7, -12 0 8,  
-12 1 8, -8 0 8, -6 1 8, -9 0 9, -5 3 20, -5 0 21,  
-5 1 21, -5 2 21, -4 3 21, -4 0 22, -4 1 22,

PLAT913\_ALERT\_3\_C Missing # of Very Strong Reflections in FCF .... 4 Note

3 1 0, -3 0 1, 3 0 1, 3 1 1,

---

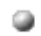

#### Alert level G

PLAT002\_ALERT\_2\_G Number of Distance or Angle Restraints on AtSite 48 Note

PLAT003\_ALERT\_2\_G Number of Uiso or Uij Restrained non-H Atoms ... 48 Report

PLAT045\_ALERT\_1\_G Calculated and Reported Z Differ by a Factor ... 2 Check

PLAT072\_ALERT\_2\_G SHELXL First Parameter in WGHT Unusually Large 0.10 Report

PLAT175\_ALERT\_4\_G The CIF-Embedded .res File Contains SAME Records 1 Report

PLAT178\_ALERT\_4\_G The CIF-Embedded .res File Contains SIMU Records 1 Report

PLAT188\_ALERT\_3\_G A Non-default SIMU Restraint Value has been used 0.0100 Report

PLAT230\_ALERT\_2\_G Hirshfeld Test Diff for C14A --C15A . 10.7 s.u.

PLAT230\_ALERT\_2\_G Hirshfeld Test Diff for C17A --C18A . 8.3 s.u.

PLAT230\_ALERT\_2\_G Hirshfeld Test Diff for C29A --C30A . 5.2 s.u.

PLAT301\_ALERT\_3\_G Main Residue Disorder .....(Resd 1) 100% Note

PLAT301\_ALERT\_3\_G Main Residue Disorder .....(Resd 2) 100% Note

PLAT302\_ALERT\_4\_G Anion/Solvent/Minor-Residue Disorder (Resd 3) 11% Note

PLAT304\_ALERT\_4\_G Non-Integer Number of Atoms in ..... (Resd 1) 23.26 Check

PLAT304\_ALERT\_4\_G Non-Integer Number of Atoms in ..... (Resd 2) 12.74 Check

PLAT333\_ALERT\_2\_G Large Aver C6-Ring C-C Dist C7A -C12A . 1.42 Ang.

PLAT335\_ALERT\_2\_G Check Large C6 Ring C-C Range C7 -C16 0.20 Ang.

PLAT811\_ALERT\_5\_G No ADDSYM Analysis: Too Many Excluded Atoms .... ! Info

PLAT860\_ALERT\_3\_G Number of Least-Squares Restraints ..... 996 Note

PLAT912\_ALERT\_4\_G Missing # of FCF Reflections Above STh/L= 0.600 276 Note

PLAT941\_ALERT\_3\_G Average HKL Measurement Multiplicity ..... 4.8 Low

PLAT969\_ALERT\_5\_G The 'Henn et al.' R-Factor-gap value ..... 5.41 Note

Predicted wR2: Based on SigI\*\*2 3.53 or SHELX Weight 18.98  
PLAT978\_ALERT\_2\_G Number C-C Bonds with Positive Residual Density. 15 Info  
PLAT992\_ALERT\_5\_G Repd & Actual \_reflns\_number\_gt Values Differ by 2 Check

---

0 **ALERT level A** = Most likely a serious problem - resolve or explain  
1 **ALERT level B** = A potentially serious problem, consider carefully  
7 **ALERT level C** = Check. Ensure it is not caused by an omission or oversight  
24 **ALERT level G** = General information/check it is not something unexpected

2 ALERT type 1 CIF construction/syntax error, inconsistent or missing data  
11 ALERT type 2 Indicator that the structure model may be wrong or deficient  
10 ALERT type 3 Indicator that the structure quality may be low  
6 ALERT type 4 Improvement, methodology, query or suggestion  
3 ALERT type 5 Informative message, check

---

It is advisable to attempt to resolve as many as possible of the alerts in all categories. Often the minor alerts point to easily fixed oversights, errors and omissions in your CIF or refinement strategy, so attention to these fine details can be worthwhile. In order to resolve some of the more serious problems it may be necessary to carry out additional measurements or structure refinements. However, the purpose of your study may justify the reported deviations and the more serious of these should normally be commented upon in the discussion or experimental section of a paper or in the "special\_details" fields of the CIF. checkCIF was carefully designed to identify outliers and unusual parameters, but every test has its limitations and alerts that are not important in a particular case may appear. Conversely, the absence of alerts does not guarantee there are no aspects of the results needing attention. It is up to the individual to critically assess their own results and, if necessary, seek expert advice.

### Publication of your CIF in IUCr journals

A basic structural check has been run on your CIF. These basic checks will be run on all CIFs submitted for publication in IUCr journals (*Acta Crystallographica*, *Journal of Applied Crystallography*, *Journal of Synchrotron Radiation*); however, if you intend to submit to *Acta Crystallographica Section C* or *E* or *IUCrData*, you should make sure that full publication checks are run on the final version of your CIF prior to submission.

### Publication of your CIF in other journals

Please refer to the *Notes for Authors* of the relevant journal for any special instructions relating to CIF submission.

---

**PLATON version of 06/01/2024; check.def file version of 05/01/2024**

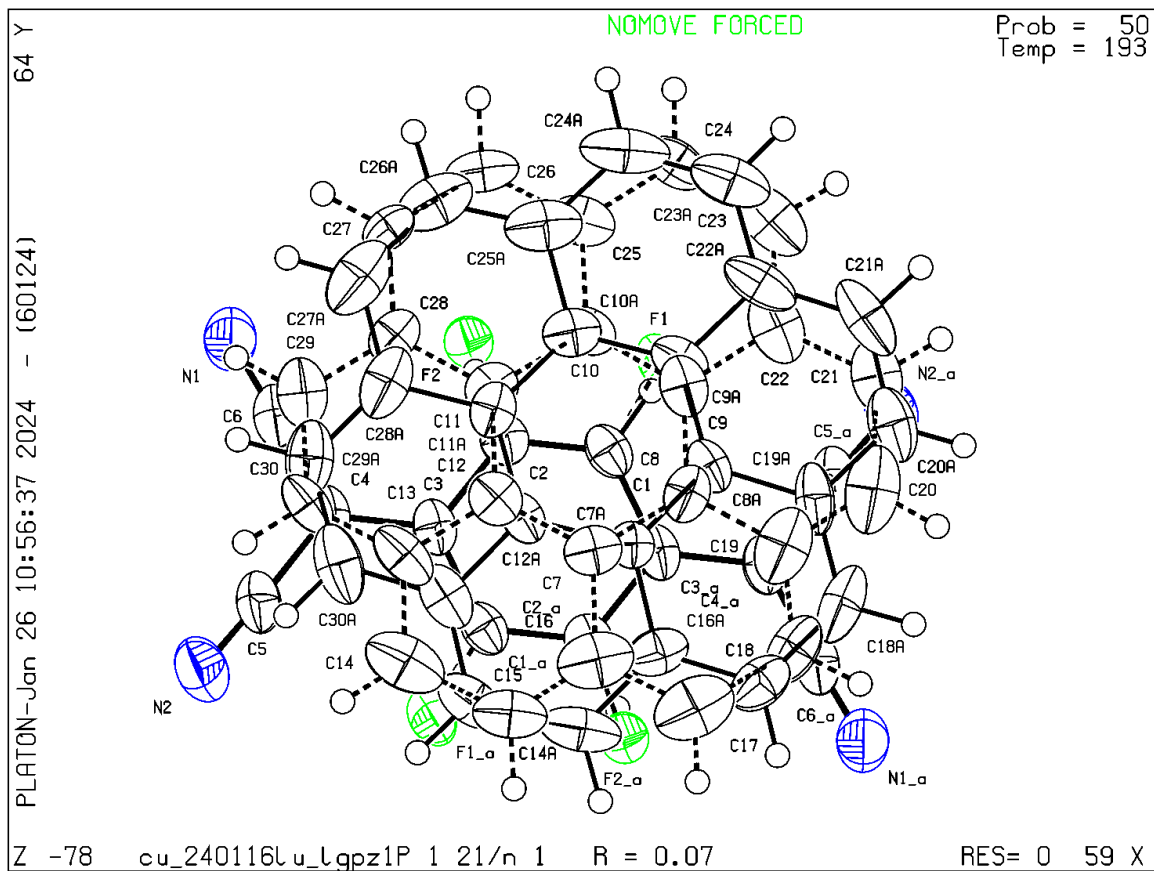

Supplement: Supplementary file 2 [file a92617a26b1a965c25793f0b.pdf]
